# Supplementary material for: Plant genotype-specific archaeal and bacterial endophytes but similar Bacillus antagonists colonize Mediterranean olive trees
Source: PubMed Central journal article supplement (PMC4347506; doi:10.3389/fmicb.2015.00138), 2015-03-03
Supplement: table_1.pdf [file table_1.pdf]

**Supplementary Table 1: Number of reads per sample in course of data processing. Prior to quality filtering raw reads from the biological replicates were joined.**

| Sample name | Olive cultivar (origin)        | Replicate  | Number of raw reads | Accession no. Sequence Read Archive (SRA, NCBI) | Number of quality reads | Number of reads after excluding plant plastid-derived reads |
|-------------|--------------------------------|------------|---------------------|-------------------------------------------------|-------------------------|-------------------------------------------------------------|
| SP3         | Arbequino (Spain)              | 1          | 63,026              | SRR1781607                                      | 72,800                  | 1,583                                                       |
|             |                                | 2          | 17,152              |                                                 |                         |                                                             |
|             |                                | 3          | 13,220              |                                                 |                         |                                                             |
|             |                                | <b>Sum</b> | <b>93,398</b>       |                                                 |                         |                                                             |
| SP5         | Ocal (Spain)                   | 1          | 109,325             | SRR1781712                                      | 214,760                 | 705                                                         |
|             |                                | 2          | 47,994              |                                                 |                         |                                                             |
|             |                                | 3          | 93,325              |                                                 |                         |                                                             |
|             |                                | <b>Sum</b> | <b>250,644</b>      |                                                 |                         |                                                             |
| I2          | Leccino (Italy)                | 1          | 54,316              | SRR1781720                                      | 184,324                 | 998                                                         |
|             |                                | 2          | 77,720              |                                                 |                         |                                                             |
|             |                                | 3          | 78,790              |                                                 |                         |                                                             |
|             |                                | <b>Sum</b> | <b>210,826</b>      |                                                 |                         |                                                             |
| GR1         | Koroneiki (Greece)             | 1          | 61,732              | SRR1781736                                      | 155,490                 | 320                                                         |
|             |                                | 2          | 88,878              |                                                 |                         |                                                             |
|             |                                | 3          | 22,909              |                                                 |                         |                                                             |
|             |                                | <b>Sum</b> | <b>173,519</b>      |                                                 |                         |                                                             |
| GR2         | Kalamata (Greece)              | 1          | 88,194              | SRR1781767                                      | 168,378                 | 210                                                         |
|             |                                | 2          | 59,146              |                                                 |                         |                                                             |
|             |                                | 3          | 51,921              |                                                 |                         |                                                             |
|             |                                | <b>Sum</b> | <b>199,261</b>      |                                                 |                         |                                                             |
| TUN1        | Chétoni (Tunisia)              | 1          | 97,612              | SRR1781768                                      | 243,741                 | 550                                                         |
|             |                                | 2          | 104,814             |                                                 |                         |                                                             |
|             |                                | 3          | 88,720              |                                                 |                         |                                                             |
|             |                                | <b>Sum</b> | <b>291,146</b>      |                                                 |                         |                                                             |
| SII         | Trylia                         | 1          | 72,028              | SRR1781984                                      | 211,470                 | 497                                                         |
|             |                                | 2          | 77,835              |                                                 |                         |                                                             |
|             |                                | 3          | 89,262              |                                                 |                         |                                                             |
|             |                                | <b>Sum</b> | <b>239,125</b>      |                                                 |                         |                                                             |
| MO1         | Picholine Marrocaïne (Morocco) | 1          | 96,852              | SRR1781986                                      | 264,994                 | 417                                                         |
|             |                                | 2          | 85,352              |                                                 |                         |                                                             |
|             |                                | 3          | 109,840             |                                                 |                         |                                                             |
|             |                                | <b>Sum</b> | <b>292,044</b>      |                                                 |                         |                                                             |
| PO1         | Galega (Portugal)              | 1          | 90,858              | SRR1781987                                      | 268,713                 | 292                                                         |
|             |                                | 2          | 91,198              |                                                 |                         |                                                             |
|             |                                | 3          | 125,200             |                                                 |                         |                                                             |
|             |                                | <b>Sum</b> | <b>307,256</b>      |                                                 |                         |                                                             |
| FR1         | Aglandau (France)              | 1          | 39,149              | SRR1781988                                      | 182,079                 | 278                                                         |
|             |                                | 2          | 92,954              |                                                 |                         |                                                             |
|             |                                | 3          | 76,243              |                                                 |                         |                                                             |
|             |                                | <b>Sum</b> | <b>208,346</b>      |                                                 |                         |                                                             |
| CY          | Oleaster (Cyprus)              | 1          | 95,967              | SRR1781989                                      | 225,374                 | 310                                                         |
|             |                                | 2          | 65,062              |                                                 |                         |                                                             |
|             |                                | 3          | 92,225              |                                                 |                         |                                                             |
|             |                                | <b>Sum</b> | <b>253,254</b>      |                                                 |                         |                                                             |
| GR (wild)   | Oleaster (Greece)              | 1          | 33,202              | SRR1781990                                      | 95,836                  | 716                                                         |
|             |                                | 2          | 30,367              |                                                 |                         |                                                             |
|             |                                | 3          | 45,837              |                                                 |                         |                                                             |
|             |                                | <b>Sum</b> | <b>109,406</b>      |                                                 |                         |                                                             |
| M1          | Oleaster (Madeira)             | 1          | 75,616              | SRR1782571                                      | 155,426                 | 964                                                         |
|             |                                | 2          | 25,052              |                                                 |                         |                                                             |
|             |                                | 3          | 76,027              |                                                 |                         |                                                             |
|             |                                | <b>Sum</b> | <b>176,695</b>      |                                                 |                         |                                                             |
